# Supplementary material for: A Comprehensive Characterisation of Volatile and Fatty Acid Profiles of Legume Seeds
Source: MDPI journal article supplement (doi:10.3390/foods8120651), 2019-12-06
Supplement: s1 [file s1]

## Supplementary Materials

**Table 1.** Pure standards injected to confirm identity of selected compounds of interest (10ppm).

| Specific compounds              | Chemical Class    | Alternative Name                          |
|---------------------------------|-------------------|-------------------------------------------|
| Hexanoic acid                   | Acid              |                                           |
| 1-hexanol                       | Alcohol           |                                           |
| 1-octen-3-ol                    | Alcohol           |                                           |
| 3-hexen-1-ol                    | Alcohol           |                                           |
| 3-methyl-butanol                | Alcohol           |                                           |
| 2(Z)-heptenal                   | Aldehyde          |                                           |
| 2(E)-octenal                    | Aldehyde          |                                           |
| 2(E)-decanal                    | Aldehyde          |                                           |
| Hexanal                         | Aldehyde          |                                           |
| 2(E)-hexenal                    | Aldehyde          |                                           |
| Benzaldehyde                    | Aldehyde          |                                           |
| 3-methyl-butanal                | Aldehyde          |                                           |
| 2-methyl-butanal                | Aldehyde          |                                           |
| 2(E), 4(E)-heptadienal          | Aldehyde          |                                           |
| 3-furaldehyde                   | Aldehyde          |                                           |
| Anethole                        | Hydrocarbon       | p-propenyl-anisole                        |
| dihydro-3-methyl-2(3h)-furanone | Esters & Lactones | $\alpha$ -Methyl- $\gamma$ -butyrolactone |
| dihydro-4-methyl-2(3h)-furanone | Esters & Lactones | $\beta$ -Methyl- $\gamma$ -butyro-lactone |
| $\beta$ -Pinene                 | Terpene           |                                           |
| D-Limonene                      | Terpene           |                                           |
| Linalool                        | Terpene           |                                           |
| o-Cymene                        | Terpene           |                                           |
| $\gamma$ -Terpinene             | Terpene           |                                           |
